# Supplementary material for: Proteome Analysis of Potato Starch Reveals the Presence of New Starch Metabolic Proteins as Well as Multiple Protease Inhibitors
Source: PubMed Central journal article supplement (PMC6013586; doi:10.3389/fpls.2018.00746), 2018-06-15
Supplement: Presentation_1.pdf [file Presentation_1.pdf]

## *Supplementary Material*

### **Proteome analysis of potato starch reveals the presence of new starch metabolic proteins as well as multiple protease inhibitors**

**Stanislas Helle<sup>1,2\*</sup>, Fabrice Bray<sup>2\*</sup>, Jérémy Verbeke<sup>2</sup>, Stéphanie Devassine<sup>2</sup>, Adeline Courseaux<sup>1</sup>, Maud Facon<sup>1,2</sup>, Caroline Tokarski<sup>2</sup>, Christian Rolando<sup>2</sup>, Nicolas Szydlowski<sup>1,2†</sup>**

<sup>1</sup> Univ. Lille, CNRS, UMR8576 – UGSF – Unité de Glycobiologie Structurale et Fonctionnelle, F-59000 Lille, France

<sup>2</sup> Univ. Lille, CNRS, USR 3290 – MSAP – Miniaturisation pour la Synthèse l'Analyse et la Protéomique, F-59000 Lille, France

\* equal contribution

† **Correspondence:**

Nicolas Szydlowski

nicolas.szydlowski@univ-lille1.fr

#### **1 Supplementary data**

**Supplementary Data Sheet 1.** LC-MS/MS analysis of the bands excised from a 7% polyacrylamide gel after electrophoretic migration of starch-isolated proteins. The first and second tabs provide information on column titles and protein accession numbers, respectively. The following tabs are numbered according to band numbers.

**Supplementary Data Sheet 2.** LC-MS/MS analysis of the bands excised from a 10% polyacrylamide gel after electrophoretic migration of starch-isolated proteins. The first and second tabs provide information on column titles and protein accession numbers, respectively. The following tabs are numbered according to band numbers.

**Supplementary Data Sheet 3.** Label-free quantification of proteins following SDS or thermolysin treatment with Maxquant. The first tab describes the column titles.

#### **2 Supplementary Figures**

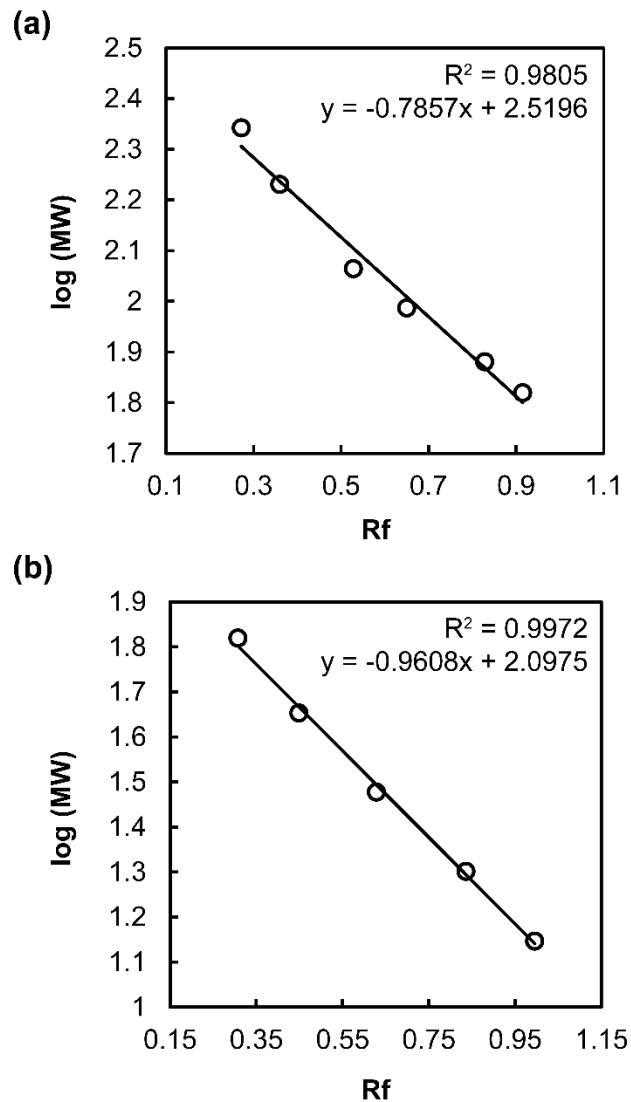

**Supplementary Figure 1.** Standard curves for protein ladder molecular weights.

(a) After electrophoretic migration on a 7% polyacrylamide gel and fluorescence staining, the Rfs of the protein ladder bands (220 kDa, 170 kDa, 116 kDa, 97 kDa, 76 kDa, 66 kDa) were determined. The migration distance of each band and of the dye front were measured from the top of the resolving gel with the use of Fiji (Schindelin et al., 2012; Schneider et al., 2012) and Rfs were plotted versus log (MW).

(b) As in (a) with the use of a 10% polyacrylamide gel and the Rfs from the protein ladder bands: 66 kDa, 45 kDa, 30 kDa, 20 kDa and 14 kDa.
